# Supplementary material for: The importance of plant-water stress for predictions of ground-level ozone in a warm world
Source: Copernicus journal article supplement (doi:10.5194/egusphere-2023-2306), 2023-10-13
Supplement: Supplementary file 1 [file egusphere-2023-2306-supplement.pdf]

# **Supplementary information for: 'The importance of plant-water stress for predictions of ground-level ozone in a warm world'**

Tamara Emmerichs<sup>1,3</sup>, Yen-Sen Lu<sup>2,3</sup>, and Domenico Taraborrelli<sup>1,3</sup>

<sup>1</sup>Institute of Energy and Climate Research, IEK-8: Troposphere, Forschungszentrum Jülich, Jülich, Germany

<sup>2</sup>Jülich Supercomputing Centre, Forschungszentrum Jülich GmbH, 52425 Jülich, Germany

<sup>3</sup>Center for Advanced Simulation and Analytics (CASA), Forschungszentrum Jülich, Jülich, Germany

**Correspondence:** Tamara Emmerichs

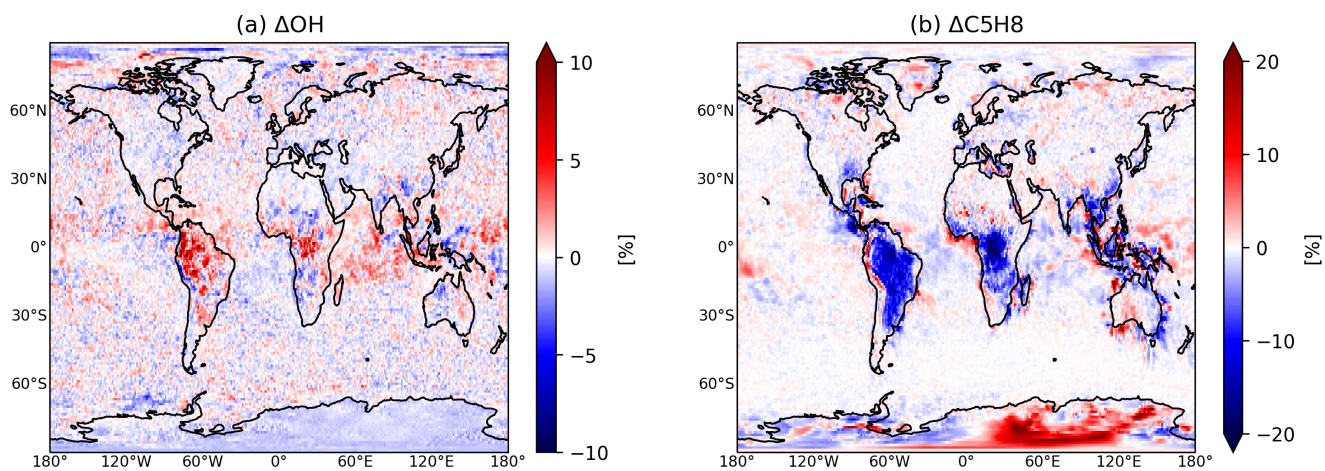

**Figure S1.** Annual mean relative change of OH (a) and isoprene (b) mixing ratio at the surface (*LWPfrac-REF*).
